# Supplementary material for: One-pot bioethanol production from cellulose by co-culture of Acremonium cellulolyticus and Saccharomyces cerevisiae
Source: PubMed Central journal article supplement (PMC3493283; doi:10.1186/1754-6834-5-64), 2012-08-31

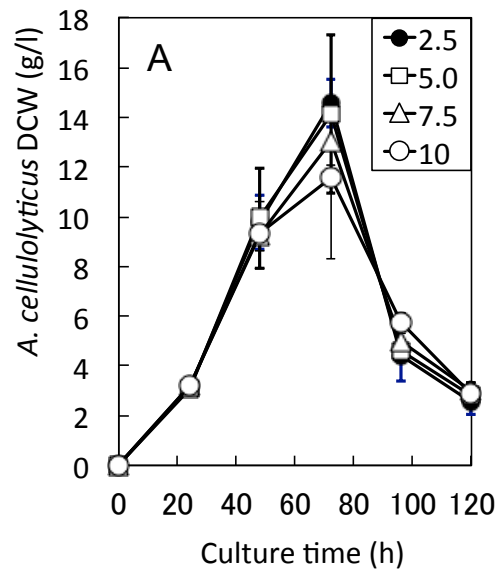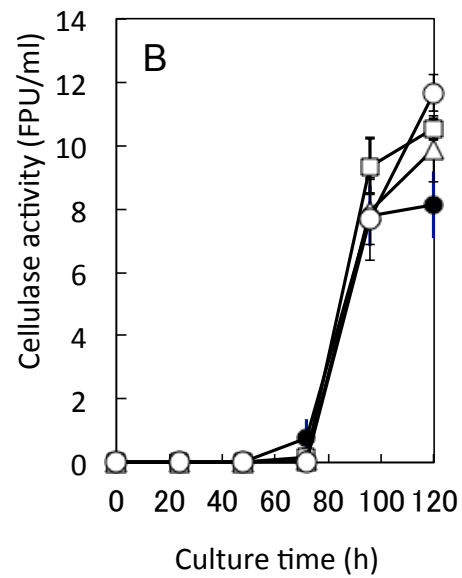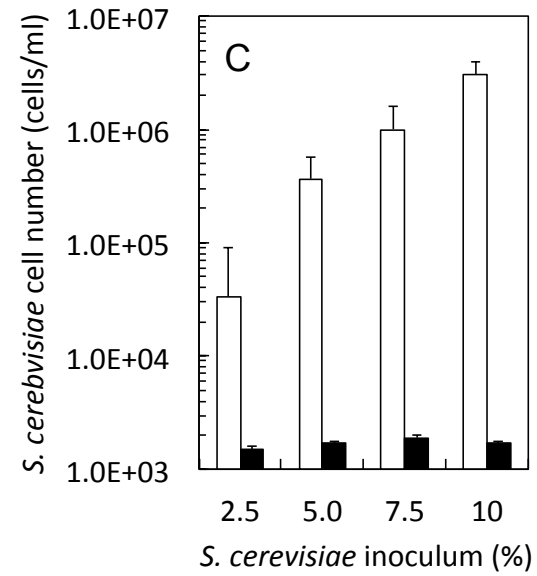

Supplement: 1754-6834-5-64-S1.pdf [file 1754-6834-5-64-S1.pdf]
